# Supplementary material for: Chemistry in a confined space: characterization of nitrogen-doped titanium oxide nanotubes produced by calcining ammonium trititanate nanotubes
Source: Royal Society of Chemistry journal article supplement (doi:10.1039/c0jm03058a), 2011-01-01
Supplement: c0jm03058a.pdf [file c0jm03058a.pdf]

## Electronic Supplementary Information

### Chemistry in a confined space: characterization of nitrogen-doped titanium

### oxide nanotubes produced by calcining ammonium trititanate nanotubes

Jui-Chun Chang,<sup>a</sup> Wei-Je Tsai,<sup>a</sup> Tsai-Chin Chiu,<sup>a</sup> Chih-Wei Liu,<sup>a</sup> Jiunn-Hsing Chao,<sup>b</sup>

and Chiu-Hsun Lin<sup>a\*</sup>

<sup>a</sup> Department of Chemistry, National Changhua University of Education, Changhua  
500, Taiwan E-mail: [chlin@cc.ncue.edu.tw](mailto:chlin@cc.ncue.edu.tw) Tel: 886-4-7232105 ext. 3541 Fax:  
886-4-7292361

<sup>b</sup> Nuclear Science and Technology Development Center, National Tsing Hua  
University, Hsinchu, 300 Taiwan

**Additional HRTEM Data.** HRTEM data verify that the calcined NH<sub>4</sub>TNT was a hollow tube at 673 K and a solid fiber at 773 K. The TEM micrographs are depicted in Figures 1 and 2 below. The micrograph in Figure 1 shows that the material calcined at 673 K clearly has tubular pores with a diameter of about 4 nm. The dimensions of the lattice fringe indicates that it contains a mixture of (001) plane of TiO<sub>2</sub> (B) phase and (101) plane of anatase phase. The micrograph in Figure 2 demonstrates that the material calcined at 773 K is a solid fiber and its crystalline composition is mainly anatase phase.

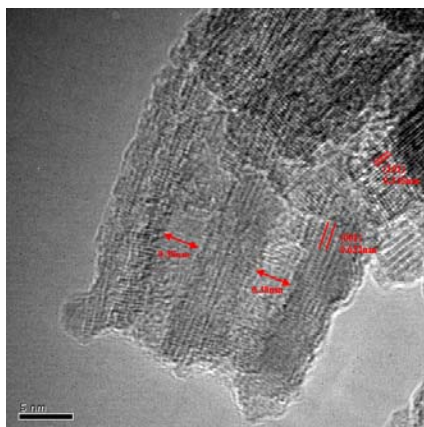

Figure S1 The HRTEM micrograph of NH<sub>4</sub>TNT that was calcined at 673 K.

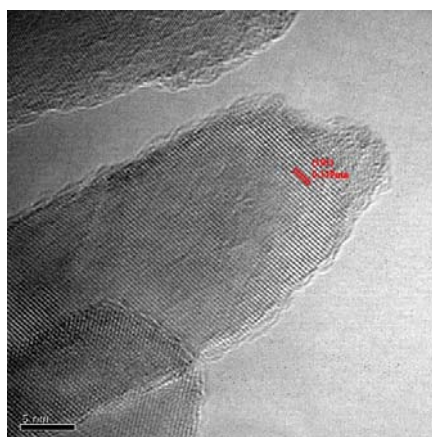

Figure S2 The HRTEM micrograph of NH<sub>4</sub>TNT that was calcined at 773 K.

**Emission Spectrum of the Light Source.** The emission spectrum of the fluorescent lamp ( $\lambda_{\text{max}} = 445 \text{ nm}$ , Taiwan Fluorescent Lamp Company) used in the photocatalytic activity tests is depicted below.

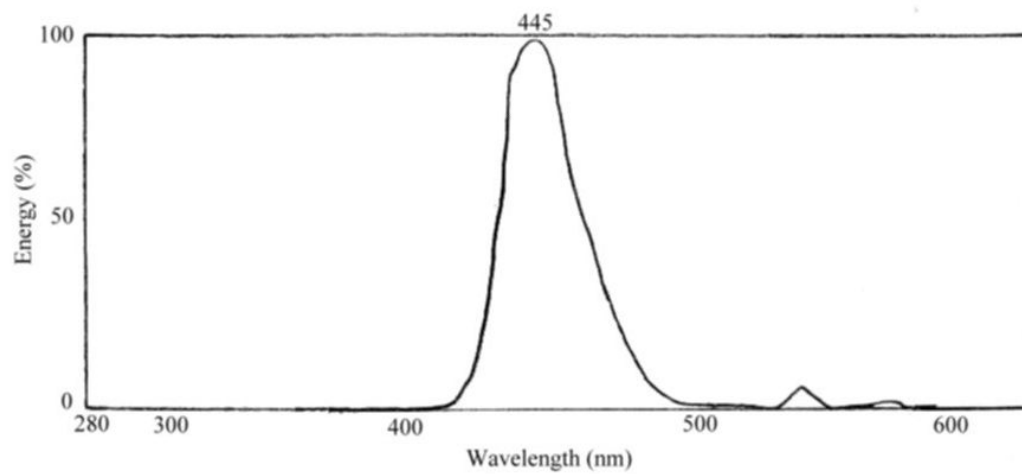

Figure S3 The emission spectrum of the light source.
